# Supplementary material for: On the lack of monoclinic distortion in the insulating regime of EuNiO3 and GdNiO3 perovskites by high-angular resolution synchrotron X-ray diffraction: a comparison with YNiO3
Source: Royal Society of Chemistry journal article supplement (doi:10.1039/d1dt00646k), 2021-01-01
Supplement: d1dt00646k1.pdf [file d1dt00646k1.pdf]

## SUPPLEMENTARY INFORMATION

### **On the lack of Monoclinic Distortion in the Insulating Regime of EuNiO<sub>3</sub> and GdNiO<sub>3</sub> perovskites by high-angular resolution synchrotron x-ray diffraction: a comparison with YNiO<sub>3</sub>**

*Federico Serrano-Sánchez,<sup>a</sup> José Luis Martínez,<sup>a</sup> François Fauth,<sup>b</sup> José Antonio Alonso<sup>a\*</sup>*

*<sup>a</sup>Instituto de Ciencia de Materiales de Madrid (ICMM). Consejo Superior de  
Investigaciones Científicas (CSIC). Sor Juana Inés de la Cruz 3, E-28049, Madrid, Spain.*

*<sup>b</sup>CELLS–ALBA Synchrotron, Cerdanyola del Valles, Barcelona, E-08290, Spain*

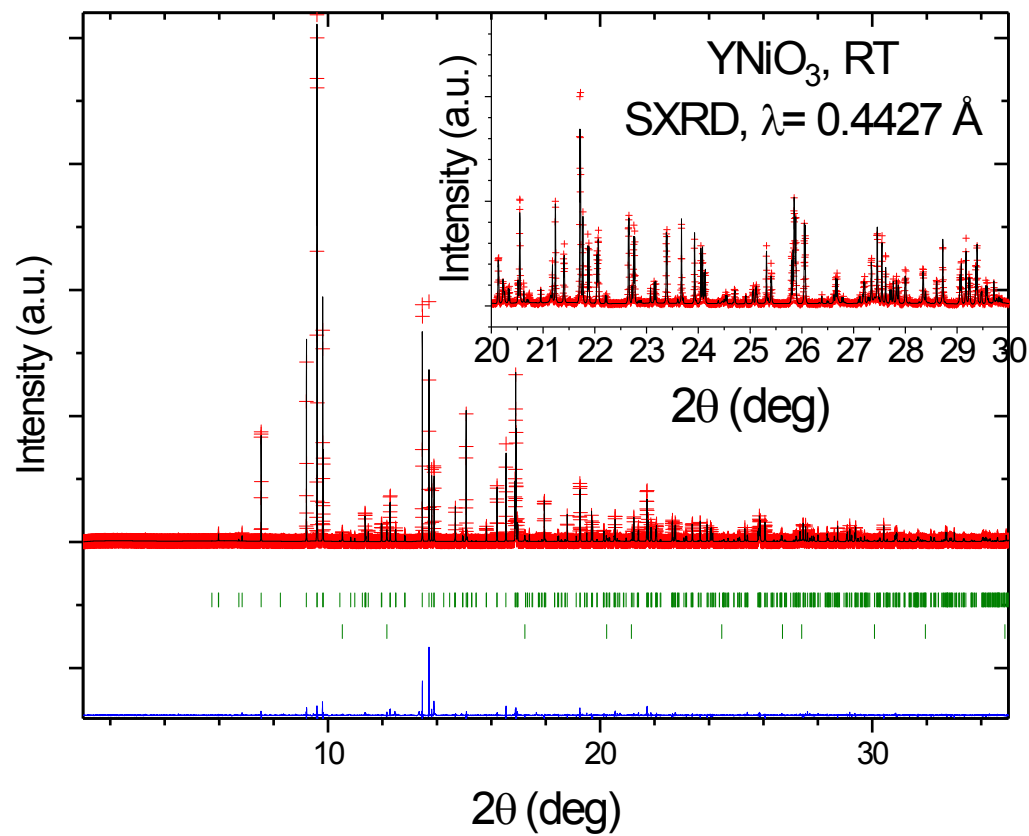

Figure S1. Rietveld plot from SXRD data for YNiO<sub>3</sub> at RT, corresponding to the structural refinement in the monoclinic  $P2_1/n$  space group. The insets show a close up of the high-angle region, highlighting the quality of the fit. The second series of Bragg reflections corresponds to a minor impurity of NiO.

Table S1. Structural parameters for YNiO<sub>3</sub>, refined at RT from SXRD data.

*Crystal data*

Monoclinic,  $P2_1/n$   $Z = 4$   
 $T = 295$  K  $\text{X-ray radiation}$   
 $a = 5.179998$  (13) Å  $b = 5.516174$  (14) Å  
 $c = 7.418316$  (19) Å  $\beta = 90.07594$  (15)°  
 $V = 211.97$  (1) Å<sup>3</sup>

*Refinement*

$R_p = 13.36\%$   $R_{wp} = 18.141\%$   
 $R_{exp} = 12.43\%$   $R_{Bragg} = 7.20\%$   
 $\chi^2 = 2.13$

Fractional atomic coordinates and isotropic or equivalent isotropic displacement parameters (Å<sup>2</sup>)

|     | $x$          | $y$          | $z$          | $U_{iso}$    |
|-----|--------------|--------------|--------------|--------------|
| Y   | 0.98165 (15) | 0.07296 (12) | 0.25011 (15) | 0.00149 (18) |
| NI1 | 0.50000      | 0.00000      | 0.00000      | 0.0029 (5)   |
| NI2 | 0.50000      | 0.00000      | 0.50000      | 0.0025 (5)   |
| O1  | 0.1011 (9)   | 0.4661 (9)   | 0.2455 (9)   | 0.0001 (13)  |
| O2  | 0.7003 (11)  | 0.3054 (13)  | 0.0471 (8)   | -0.0009 (15) |
| O3  | 0.1884 (11)  | 0.1994 (13)  | 0.9499 (8)   | 0.0003 (16)  |
